# Supplementary material for: Molecular mechanism and physiological functions of clathrin-mediated endocytosis
Source: Springer Nature journal article supplement (doi:10.1038/nrm3151), 2011-07-22
Supplement: 41580_2011_BFnrm3151_MOESM1_ESM.pdf [file 41580_2011_BFnrm3151_MOESM1_ESM.pdf]

Supplementary information S1 (table) | Clathrin-mediated endocytosis and human diseases

| Disease category                     | Protein              | Gene           | Disease*                                                                                                            | Alterations**                                                                                      | References                                                                                                                                                                                                                                                                                      |
|--------------------------------------|----------------------|----------------|---------------------------------------------------------------------------------------------------------------------|----------------------------------------------------------------------------------------------------|-------------------------------------------------------------------------------------------------------------------------------------------------------------------------------------------------------------------------------------------------------------------------------------------------|
| <b>Cancer</b>                        | Clathrin heavy chain | <i>CLTC</i>    | IMT<br>Large B-cell lymphoma<br>Paediatric renal carcinoma<br>Renal cancer<br>Breast cancer                         | CLTC-ALK fusion<br>CLTC-ALK fusion<br>CLTC-TFE3 fusion<br>somatic mutation<br>somatic mutations    | Bridge JA et al. Am J Pathol 2001, 159, 411<br>De Paepe P et al. Blood 2003, 102, 2638<br>Argani P et al. Oncogene 2003, 22, 5374<br>Dalglish GL et al. Nature 2010, 463, 360<br>Kan Z. et al. Nature 2010, 466, 869                                                                            |
|                                      | EPS15                | <i>EPS15</i>   | AML<br>Lung cancer                                                                                                  | somatic mutations, EPS15-MLL fusion<br>somatic mutations                                           | Bernard OA, et al. Oncogene 1994, 9, 1039<br>Kan Z. et al. Nature 2010, 466, 869                                                                                                                                                                                                                |
|                                      | CALM                 | <i>PICALM</i>  | ALL and AML                                                                                                         | PICALM-AF10, -MLL fusions, som. mutations                                                          | Dreyling MH et al. PNAS, 1996, 93, 4804                                                                                                                                                                                                                                                         |
|                                      | Dab2                 | <i>DAB2</i>    | Ovarian cancer<br>Prostate cancer<br>Bladder cancer<br>Breast cancer<br>Oesophageal cancer<br>Colorectal carcinomas | Downregulated<br>Downregulated<br>Downregulated<br>Downregulated<br>Downregulated<br>Downregulated | Mok SC et al. Oncogene 1998, 16, 2381<br>Tseng CP et al. Endocrinology 1998, 139, 3542<br>Karam JA et al. Clin Cancer Res 2007, 13, 4400<br>Fazili Z et al. Oncogene 1999, 18, 3104<br>Anupam K et al. World J Gastroenterol 2006, 12, 6041<br>Kleef J et al. Dis. Colon Rectum. 2002, 45, 1242 |
|                                      | Endophilin           | <i>SH3GL1</i>  | AML                                                                                                                 | EEN-MLL fusion, somatic mutations                                                                  | So CW et al. PNAS 1997, 94, 2563                                                                                                                                                                                                                                                                |
|                                      | HIP1                 | <i>HIP1</i>    | CMML<br>Lung cancer<br>Breast cancer                                                                                | HIP1-PDGFRB fusion, somatic mutations<br>somatic mutations<br>somatic mutations                    | Ross TS et al. Blood 1998, 91, 4419<br>Kan Z. et al. Nature 2010, 466, 869<br>Kan Z. et al. Nature 2010, 466, 869                                                                                                                                                                               |
|                                      | HIP1R                | <i>HIP1R</i>   | Colon cancer<br>CLL                                                                                                 | overexpressed<br>overexpressed                                                                     | Scanlan MJ et al. Cancer Res. 2002, 62, 4041<br>Porpaczy E et al. Eur J Clin Invest 2009, 39, 568                                                                                                                                                                                               |
|                                      | Cortactin            | <i>CTTN</i>    | Primary breast carcinomas                                                                                           | Amplification, protein overexpression                                                              | Schuuring E. et al. Oncogene, 1992, 7, 355                                                                                                                                                                                                                                                      |
|                                      | βArrestin1           | <i>ARRB1</i>   | Breast cancer                                                                                                       | somatic mutations                                                                                  | Kan Z. et al. Nature 2010, 466, 869                                                                                                                                                                                                                                                             |
|                                      | Numb                 | <i>NUMB</i>    | Breast cancer                                                                                                       | Downregulated                                                                                      | Pece S. et al. J Cell Biol 2004, 167, 215                                                                                                                                                                                                                                                       |
| <b>Psychiatric diseases</b>          | Amphiphysin          | <i>BIN1</i>    | Schizophrenia                                                                                                       | increased expression                                                                               | English JA et al. Proteomics 2009, 9, 3368                                                                                                                                                                                                                                                      |
|                                      | Endophilin           | <i>SH3GL1</i>  | Schizophrenia                                                                                                       | decreased expression                                                                               | Prabakaran S et al. Mol Psychiatry, 9, 2004                                                                                                                                                                                                                                                     |
|                                      | Dynamin              | <i>DNM1</i>    | Schizophrenia                                                                                                       | increased expression                                                                               | Prabakaran S et al. Mol Psychiatry, 2004, 9, 684<br>Clark D et al. Mol Psychiatry 2006, 11, 459<br>Pennington K et al. Mol Psychiatry, 2007, 13, 1102                                                                                                                                           |
|                                      | Synaptojanin         | <i>SYNJ1</i>   | Bipolar disorder                                                                                                    | mutations                                                                                          | Saito T et al. Mol Psychiatry 2001, 6, 387                                                                                                                                                                                                                                                      |
| <b>Neuropathies &amp; Myopathies</b> | Amphiphysin          | <i>BIN1</i>    | CNM                                                                                                                 | mutations                                                                                          | Nicot AS et al. Nat Genet. 2007, 39, 1134                                                                                                                                                                                                                                                       |
|                                      | Dynamin              | <i>DNM2</i>    | CNM<br>CMT                                                                                                          | mutations<br>mutations                                                                             | Bitoun M et al. Nat Genet 2005, 37, 1207<br>Zuchner S et al. Nat Genet 2005, 37, 289                                                                                                                                                                                                            |
| <b>Neurodegenerative diseases</b>    | CALM                 | <i>PICALM</i>  | Alzheimer                                                                                                           | SNPs                                                                                               | Harold D et al. Nat Genet 2009, 41, 1088                                                                                                                                                                                                                                                        |
|                                      | Amphiphysin          | <i>BIN1</i>    | Alzheimer                                                                                                           | SNPs                                                                                               | Seshadri S et al. JAMA 2010, 303, 1832                                                                                                                                                                                                                                                          |
| <b>Metabolic syndromes</b>           | ARH                  | <i>LDLRAP1</i> | Autosomal recessive hypercholesterolaemia                                                                           | mutations                                                                                          | Garcia CK, et al. Science 2001, 292, 1394                                                                                                                                                                                                                                                       |
|                                      | SGIP1                | <i>SGIP1</i>   | Obesity                                                                                                             | SNPs                                                                                               | Cummings N et al. Int J. Obesity 2011, in press                                                                                                                                                                                                                                                 |
|                                      | SHIP2                | <i>INPP1L</i>  | Type2 diabetes<br>Hypertension<br>Central obesity<br>Dyslipidaemia                                                  | deletion inducing increased expression<br>mutations<br>mutations<br>mutations                      | Clement S. et al. Nature 2001, 409, 92<br>Kaisaki PJ et al., Diabetes 2004, 53, 1900<br>Kaisaki PJ et al., Diabetes 2004, 53, 1900<br>Kaisaki PJ et al., Diabetes 2004, 53, 1900                                                                                                                |
| <b>Genetic syndromes</b>             | OCRL                 | <i>OCRL1</i>   | Lowe Syndrome<br>Dent Syndrome                                                                                      | X-linked, eye, nervous system, kidney disease<br>X-linked, renal only form of Lowe syndrome        | Attre O et al. Nature 1992, 358, 239<br>Hoopes RR et al. Am J Hum Genet 2005, 76, 260                                                                                                                                                                                                           |
|                                      | Synaptojanin         | <i>SYNJ1</i>   | Down Syndrome                                                                                                       | gene on Chr 21 - increased expression                                                              | Arai Y et al. Brain Development 2002, 24, 67                                                                                                                                                                                                                                                    |
|                                      | Intersectin          | <i>ITSN1</i>   | Down Syndrome                                                                                                       | gene on Chr 21 - increased expression                                                              | Pucharcos C. et al. Eur J Hum Genet. 1999, 7, 704                                                                                                                                                                                                                                               |
|                                      | Dyrk1A               | <i>DYRK1A</i>  | Down Syndrome                                                                                                       | gene on Chr 21 - increased expression                                                              | Guimera J et al. Genomics 1999, 57, 407                                                                                                                                                                                                                                                         |

\* IMT, Inflammatory Myoblastic Tumour; AML, Acute Myeloid Leukaemia; ALL, Acute Lymphoblastic Leukaemia; CMML, Chronic Myelomonocytic Leukaemia; CLL, Chronic Lymphocytic Leukaemia; CNM, autosomal dominant centronuclear myopathy; CMT, dominant intermediate Charcot-Marie-Tooth disease

\*\* alterations in human diseases
